# Supplementary material for: Using overbooking to manage no-shows in an Italian healthcare center
Source: PubMed Central journal article supplement (PMC5856203; doi:10.1186/s12913-018-2979-z), 2018-03-15
Supplement: 12913_2018_2979_MOESM1_ESM.pdf [file 12913_2018_2979_MOESM1_ESM.pdf]

**Additional file 1: Web appendix****Table 1: Logistic regression results for the Echography ward (2 available scanners).**

| Variable                                        |                        | Echography          |
|-------------------------------------------------|------------------------|---------------------|
| Intercept                                       |                        | 0.563 (4.94) ***    |
| <i>Patient's intrinsic factors</i>              |                        |                     |
| Gender                                          | Female                 | 0.076 (1.93)        |
| Age group                                       | 0-18                   | 0.349 (4.69) ***    |
| "                                               | 19-45                  | 0.191 (4.34) ***    |
| "                                               | 65-79                  | 0.031 (0.46)        |
| "                                               | 80+                    | 0.116 (0.94)        |
| Insurance status                                | Private                | -1.726 (-21.81) *** |
| Rate of previous cancellations                  |                        | 0.179 (1.95)        |
| Rate of previous no-shows                       |                        | 1.796 (10.32) ***   |
| Type of patient                                 | Returned patient       | -0.781 (-18.36) *** |
| Booking confirmation                            | Confirmed              | -1.578 (-19.19) *** |
| Type of booking                                 | Web                    | -0.015 (-0.06)      |
| <i>Exogenous factors</i>                        |                        |                     |
| Day of the week                                 | Monday                 | -0.118 (-1.86)      |
| "                                               | Tuesday                | -0.164 (-2.74) **   |
| "                                               | Thursday               | -0.228 (-3.59) ***  |
| "                                               | Friday                 | -0.038 (-0.7)       |
| "                                               | Saturday               | -0.405 (-4.89) ***  |
| Month of the year                               | January                | -0.095 (-1.01)      |
| "                                               | February               | -0.029 (-0.24)      |
| "                                               | April                  | -0.046 (-0.47)      |
| "                                               | May                    | 0.179 (1.85)        |
| "                                               | June                   | 0.197 (1.97) *      |
| "                                               | July                   | -0.059 (-0.58)      |
| "                                               | August                 | 0.258 (2.28) *      |
| "                                               | September              | -0.168 (-1.72)      |
| "                                               | October                | 0.157 (1.33)        |
| "                                               | November               | -0.029 (-0.2)       |
| "                                               | December               | 0.062 (0.41)        |
| Year                                            | 2013                   | -0.006 (-0.11)      |
| "                                               | 2014                   | -0.127 (-1.5)       |
| Time of the day                                 | 1PM-8PM                | -0.094 (-2.31) *    |
| Long weekend                                    | Yes                    | 0.082 (1.46)        |
| Weather forecast                                | Rain                   | 0.148 (3.27) **     |
| "                                               | Storm                  | 0.056 (0.93)        |
| Text Message Reminder Service                   | Activated but not sent | -0.08 (-0.86)       |
| "                                               | Sent                   | -0.401 (-4.06) ***  |
| <i>Factors associated with the examination</i>  |                        |                     |
| No NHS coverage period                          | Yes                    | 0.296 (2.79) **     |
| Price of the examination                        |                        | 0.001 (3.08) **     |
| Waiting list                                    |                        | 0.007 (3.95) ***    |
| Time allowed                                    |                        | -0.002 (-1.96)      |
| <i>Goodness of fit measures</i>                 |                        | Echography          |
|                                                 | R <sup>2</sup>         | 0.1                 |
|                                                 | Hosmer-Lemeshow        | 16.3                |
|                                                 | AIC                    | 10169.02            |
|                                                 | AUC                    | 0.72                |
| <i>Goodness of fit measures - Out of Sample</i> |                        | Echography          |
|                                                 | Hosmer-Lemeshow        | 57.13               |
|                                                 | AUC                    | 0.68                |

Estimated parameters, z-value (in parentheses) and significance symbols are reported.

Significance codes: 0 '\*\*\*' 0.001 '\*\*' 0.01 '\*' 0.05

**Table 2: Logistic regression results for the Echo Doppler ward (2 available scanners).**

| Variable                                        |                        | Echo Doppler       |
|-------------------------------------------------|------------------------|--------------------|
| Intercept                                       |                        | 1.403 (106)        |
| <i>Patient's intrinsic factors</i>              |                        |                    |
| Gender                                          | Female                 | -0.28 (-1.75)      |
| Age group                                       | 0-18                   | -0.345 (-0.86)     |
| "                                               | 19-45                  | 0.062 (0.36)       |
| "                                               | 65-79                  | 0.018 (0.09)       |
| "                                               | 80+                    | -0.312 (-0.83)     |
| Insurance status                                | Private                | -1.766 (-3.13) **  |
| Rate of previous cancellations                  |                        | 0.295 (0.8)        |
| Rate of previous no-shows                       |                        | 1.416 (2.27) *     |
| Type of patient                                 | Returned patient       | -1.141 (-6.99) *** |
| Booking confirmation                            | Confirmed              | -1.369 (-8.03) *** |
| Type of booking                                 | Web                    | 1.372 (1.13)       |
| <i>Exogenous factors</i>                        |                        |                    |
| Day of the week                                 | Monday                 | -0.093 (-0.31)     |
| "                                               | Tuesday                | -0.687 (-1.3)      |
| "                                               | Thursday               | -1.269 (-2.44) *   |
| "                                               | Friday                 | -0.92 (-3.49) ***  |
| "                                               | Saturday               | 0.342 (0.42)       |
| Month of the year                               | January                | 0.035 (0.08)       |
| "                                               | February               | 0.448 (1.18)       |
| "                                               | April                  | 0.464 (0.84)       |
| "                                               | May                    | 0.759 (1.45)       |
| "                                               | June                   | 0.473 (0.89)       |
| "                                               | July                   | 0.226 (0.41)       |
| "                                               | August                 | 0.374 (0.53)       |
| "                                               | September              | 0.436 (0.78)       |
| "                                               | October                | 0.056 (0.1)        |
| "                                               | November               | -0.124 (-0.18)     |
| "                                               | December               | 0.575 (0.86)       |
| Year                                            | 2013                   | 0.5 (1.29)         |
| "                                               | 2014                   | 0.876 (1.54)       |
| Time of the day                                 | 1PM-8PM                | -0.116 (-0.47)     |
| Long weekend                                    | Yes                    | 0.289 (1.26)       |
| Weather forecast                                | Rain                   | -0.41 (-2.12) *    |
| "                                               | Storm                  | -0.014 (-0.06)     |
| Text Message Reminder Service                   | Activated but not sent | -0.691 (-1.41)     |
| "                                               | Sent                   | -0.862 (-1.7)      |
| <i>Factors associated with the examination</i>  |                        |                    |
| No NHS coverage period                          | Yes                    | 0.326 (0.85)       |
| Price of the examination                        |                        | -0.001 (-0.69)     |
| Waiting list                                    |                        | 0.013 (1.5)        |
| Time allowed                                    |                        | -0.013 (-1.46)     |
| <i>Goodness of fit measures</i>                 |                        | Echo Doppler       |
|                                                 | R <sup>2</sup>         | 0.13               |
|                                                 | Hosmer-Lemeshow        | 7.58               |
|                                                 | AIC                    | 779.09             |
|                                                 | AUC                    | 0.74               |
| <i>Goodness of fit measures - Out of Sample</i> |                        | Echo Doppler       |
|                                                 | Hosmer-Lemeshow        | 19.22              |
|                                                 | AUC                    | 0.62               |

Estimated parameters, z-value (in parentheses) and significance symbols are reported.

Significance codes: 0 '\*\*\*' 0.001 '\*\*' 0.01 '\*' 0.05

**Table 3: Logistic regression results for the Mammography ward (1 available scanner).**

| Variable                                        |                        | Mammography         |
|-------------------------------------------------|------------------------|---------------------|
| Intercept                                       |                        | 0.494 (1.11)        |
| <i>Patient's intrinsic factors</i>              |                        |                     |
| Age group                                       | 19-45                  | 0.021 (0.15)        |
| "                                               | 65-79                  | -0.879 (-5.49) ***  |
| "                                               | 80+                    | -1.382 (-2.33) *    |
| Insurance status                                | Private                | -4.885 (-6.15) ***  |
| Rate of previous cancellations                  |                        | 0.307 (1.18)        |
| Rate of previous no-shows                       |                        | 1.72 (2.41) *       |
| Type of patient                                 | Returned patient       | -1.433 (-9.35) ***  |
| Booking confirmation                            | Confirmed              | -1.645 (-11.62) *** |
| Type of booking                                 | Web                    | 1.065 (1.98) *      |
| <i>Exogenous factors</i>                        |                        |                     |
| Day of the week                                 | Monday                 | 0.257 (1.36)        |
| "                                               | Tuesday                | 0.615 (3.28) **     |
| "                                               | Thursday               | 0.237 (1.27)        |
| "                                               | Friday                 | 0.244 (1.32)        |
| "                                               | Saturday               | -0.126 (-0.43)      |
| Month of the year                               | January                | -0.3 (-1.09)        |
| "                                               | February               | 0.304 (1.14)        |
| "                                               | April                  | -0.1 (-0.4)         |
| "                                               | May                    | 0.029 (0.1)         |
| "                                               | June                   | 0.664 (2.5) *       |
| "                                               | July                   | 0.18 (0.69)         |
| "                                               | August                 | 0.34 (1.05)         |
| "                                               | September              | 0.169 (0.52)        |
| "                                               | October                | 0.041 (0.11)        |
| "                                               | November               | -0.275 (-0.63)      |
| "                                               | December               | -0.059 (-0.11)      |
| Year                                            | 2013                   | 0.19 (0.88)         |
| "                                               | 2014                   | 0.209 (0.6)         |
| Time of the day                                 | 1PM-8PM                | 0.244 (1.33)        |
| Long weekend                                    | Yes                    | 0.012 (0.07)        |
| Weather forecast                                | Rain                   | -0.032 (-0.21)      |
| "                                               | Storm                  | -0.166 (-0.97)      |
| Text Message Reminder Service                   | Activated but not sent | -0.687 (-2.27) *    |
| "                                               | Sent                   | -0.558 (-1.69)      |
| <i>Factors associated with the examination</i>  |                        |                     |
| No NHS coverage period                          | Yes                    | 4.185 (5.73) ***    |
| Price of the examination                        |                        | -0.015 (-1.72)      |
| Waiting list                                    |                        | 0.017 (4.2) ***     |
| Time allowed                                    |                        | 0.004 (0.38)        |
| <i>Goodness of fit measures</i>                 |                        | Mammography         |
|                                                 | R <sup>2</sup>         | 0.39                |
|                                                 | Hosmer-Lemeshow        | 10.54               |
|                                                 | AIC                    | 1480.78             |
|                                                 | AUC                    | 0.9                 |
| <i>Goodness of fit measures - Out of Sample</i> |                        | Mammography         |
|                                                 | Hosmer-Lemeshow        | 13.84               |
|                                                 | AUC                    | 0.88                |

Estimated parameters, z-value (in parentheses) and significance symbols are reported.

Significance codes: 0 '\*\*\*' 0.001 '\*\*' 0.01 '\*' 0.05

**Table 4: Logistic regression results for the Orthopantomography ward (1 available scanner).**

| Variable                                        |                        | Orthopantomography  |
|-------------------------------------------------|------------------------|---------------------|
| Intercept                                       |                        | -0.103 (-0.21)      |
| <i>Patient's intrinsic factors</i>              |                        |                     |
| Gender                                          | Female                 | -0.018 (-0.17)      |
| Age group                                       | 0-18                   | 0.291 (1.68)        |
| "                                               | 19-45                  | 0.46 (3.79) ***     |
| "                                               | 65-79                  | -0.79 (-4.86) ***   |
| "                                               | 80+                    | -1.017 (-3.02) **   |
| Insurance status                                | Private                | -3.945 (-22.77) *** |
| Rate of previous cancellations                  |                        | 0.402 (1.68)        |
| Rate of previous no-shows                       |                        | 0.314 (0.81)        |
| Type of patient                                 | Returned patient       | -0.774 (-6.44) ***  |
| Booking confirmation                            | Confirmed              | -2.162 (-8.07) ***  |
| Type of booking                                 | Web                    | -0.484 (-1.25)      |
| <i>Exogenous factors</i>                        |                        |                     |
| Day of the week                                 | Monday                 | -0.18 (-1.05)       |
| "                                               | Tuesday                | -0.477 (-2.75) **   |
| "                                               | Thursday               | -0.29 (-1.65)       |
| "                                               | Friday                 | -0.307 (-1.85)      |
| "                                               | Saturday               | 0.053 (0.29)        |
| Month of the year                               | January                | 0.148 (0.4)         |
| "                                               | February               | 0.286 (0.79)        |
| "                                               | April                  | -0.201 (-0.5)       |
| "                                               | May                    | -0.155 (-0.4)       |
| "                                               | June                   | -0.074 (-0.19)      |
| "                                               | July                   | -0.179 (-0.46)      |
| "                                               | August                 | -0.225 (-0.52)      |
| "                                               | September              | -0.092 (-0.23)      |
| "                                               | October                | 0.408 (0.94)        |
| "                                               | November               | 0.443 (0.96)        |
| "                                               | December               | 0.489 (1.03)        |
| Year                                            | 2014                   | -0.535 (-1.36)      |
| Time of the day                                 | 1PM-8PM                | 0.428 (3.7) ***     |
| Long weekend                                    | Yes                    | 0.044 (0.28)        |
| Weather forecast                                | Rain                   | -0.023 (-0.17)      |
| "                                               | Storm                  | 0.065 (0.46)        |
| Text Message Reminder Service                   | Activated but not sent | 0.555 (1.36)        |
| <i>Factors associated with the examination</i>  |                        |                     |
| No NHS coverage period                          | Yes                    | 1.844 (6.04) ***    |
| Waiting list                                    |                        | 0.046 (4.63) ***    |
| Time allowed                                    |                        | 0.05 (2.01) *       |
| <i>Goodness of fit measures</i>                 |                        |                     |
|                                                 | R <sup>2</sup>         | 0.31                |
|                                                 | Hosmer-Lemeshow        | 9.98                |
|                                                 | AIC                    | 1589.04             |
|                                                 | AUC                    | 0.86                |
| <i>Goodness of fit measures - Out of Sample</i> |                        |                     |
|                                                 | Hosmer-Lemeshow        | 10.22               |
|                                                 | AUC                    | 0.9                 |

Estimated parameters, z-value (in parentheses) and significance symbols are reported.

Significance codes: 0 '\*\*\*' 0.001 '\*\*' 0.01 '\*' 0.05

**Table 5: Logistic regression results for the Radiography ward (1 available scanner).**

| Variable                                        |                        | Radiography         |
|-------------------------------------------------|------------------------|---------------------|
| Intercept                                       |                        | -0.063 (-0.65)      |
| <i>Patient's intrinsic factors</i>              |                        |                     |
| Gender                                          | Female                 | 0.125 (3.42) ***    |
| Age group                                       | 0-18                   | 0.227 (3.61) ***    |
| "                                               | 19-45                  | 0.368 (7.67) ***    |
| "                                               | 65-79                  | -0.596 (-11.86) *** |
| "                                               | 80+                    | -0.51 (-6.03) ***   |
| Insurance status                                | Private                | -3.772 (-43.26) *** |
| Rate of previous cancellations                  |                        | 0.132 (1.62)        |
| Rate of previous no-shows                       |                        | 1.806 (10.86) ***   |
| Type of patient                                 | Returned patient       | -0.808 (-19.24) *** |
| Booking confirmation                            | Confirmed              | -1.48 (-30.76) ***  |
| Type of booking                                 | Web                    | 0.536 (1.52)        |
| <i>Exogenous factors</i>                        |                        |                     |
| Day of the week                                 | Monday                 | 0.033 (0.55)        |
| "                                               | Tuesday                | 0.046 (0.78)        |
| "                                               | Thursday               | 0.03 (0.51)         |
| "                                               | Friday                 | 0.104 (1.72)        |
| "                                               | Saturday               | 0.288 (4.45) ***    |
| Month of the year                               | January                | -0.064 (-0.75)      |
| "                                               | February               | 0.063 (0.77)        |
| "                                               | April                  | 0.139 (1.55)        |
| "                                               | May                    | 0.014 (0.16)        |
| "                                               | June                   | -0.026 (-0.29)      |
| "                                               | July                   | -0.175 (-1.92)      |
| "                                               | August                 | -0.062 (-0.63)      |
| "                                               | September              | 0.088 (0.82)        |
| "                                               | October                | 0.127 (1.12)        |
| "                                               | November               | -0.192 (-1.36)      |
| "                                               | December               | -0.142 (-0.99)      |
| Year                                            | 2013                   | 0.016 (0.32)        |
| "                                               | 2014                   | -0.075 (-0.98)      |
| Time of the day                                 | 1PM-8PM                | 0.186 (4.58) ***    |
| Long weekend                                    | Yes                    | -0.046 (-0.91)      |
| Weather forecast                                | Rain                   | -0.016 (-0.37)      |
| "                                               | Storm                  | 0.05 (0.89)         |
| Text Message Reminder Service                   | Activated but not sent | 0.023 (0.25)        |
| "                                               | Sent                   | -0.573 (-5.73) ***  |
| <i>Factors associated with the examination</i>  |                        |                     |
| No NHS coverage period                          | Yes                    | 2.651 (20.94) ***   |
| Price of the examination                        |                        | 0 (0.97)            |
| Waiting list                                    |                        | 0.031 (10.38) ***   |
| Time allowed                                    |                        | -0.004 (-2.42) *    |
| <i>Goodness of fit measures</i>                 |                        | Radiography         |
|                                                 | R <sup>2</sup>         | 0.25                |
|                                                 | Hosmer-Lemeshow        | 20.18               |
|                                                 | AIC                    | 12764.35            |
|                                                 | AUC                    | 0.84                |
| <i>Goodness of fit measures - Out of Sample</i> |                        | Radiography         |
|                                                 | Hosmer-Lemeshow        | 31.13               |
|                                                 | AUC                    | 0.85                |

Estimated parameters, z-value (in parentheses) and significance symbols are reported.

Significance codes: 0 '\*\*\*' 0.001 '\*\*' 0.01 '\*' 0.05

**Table 6: Logistic regression results for the Computer-Assisted Tomography ward (2 available scanners).**

| Variable                                        |                        | Computer-Assisted Tomography |
|-------------------------------------------------|------------------------|------------------------------|
| Intercept                                       |                        | -1.639 (-26.35) ***          |
| <i>Patient's intrinsic factors</i>              |                        |                              |
| Gender                                          | Female                 | 0.15 (6.38) ***              |
| Age group                                       | 0-18                   | 0.244 (3.8) *                |
| "                                               | 19-45                  | 0.155 (5.01) ***             |
| "                                               | 65-79                  | -0.043 (-1.46)               |
| "                                               | 80+                    | 0.137 (2.71) **              |
| Insurance status                                | Private                | -0.319 (-3.73) **            |
| Rate of previous cancellations                  |                        | 0.259 (4.65) ***             |
| Rate of previous no-shows                       |                        | 1.677 (15.37) ***            |
| Type of patient                                 | Returned patient       | -0.748 (-29.22) ***          |
| Booking confirmation                            | Confirmed              | -1.056 (-36) ***             |
| Type of booking                                 | Web                    | 1.049 (4.93) ***             |
| <i>Exogenous factors</i>                        |                        |                              |
| Day of the week                                 | Monday                 | 0.113 (2.92) **              |
| "                                               | Tuesday                | 0.114 (3.01) **              |
| "                                               | Thursday               | 0.039 (0.98)                 |
| "                                               | Friday                 | -0.022 (-0.54)               |
| "                                               | Saturday               | 0.018 (0.39)                 |
| "                                               | Sunday                 | 0.135 (1.02)                 |
| Month of the year                               | January                | 0.136 (2.68) **              |
| "                                               | February               | 0.054 (1)                    |
| "                                               | April                  | -0.033 (-0.59)               |
| "                                               | May                    | 0.007 (0.13)                 |
| "                                               | June                   | -0.134 (-2.43)               |
| "                                               | July                   | -0.063 (-1.16)               |
| "                                               | August                 | 0.111 (1.73)                 |
| "                                               | September              | 0.02 (0.37)                  |
| "                                               | October                | 0.104 (1.49)                 |
| "                                               | November               | -0.088 (-0.78)               |
| "                                               | December               | 0.014 (0.12)                 |
| Year                                            | 2013                   | -0.026 (-0.83)               |
| "                                               | 2014                   | -0.36 (-7.57) ***            |
| Time of the day                                 | 6AM-8AM                | 0.192 (3.78) ***             |
| "                                               | 1PM-8PM                | 0.111 (4.01) ***             |
| "                                               | 8PM-2AM (+1d)          | 0.524 (8.63) ***             |
| Long weekend                                    | Yes                    | 0.095 (2.79) **              |
| Weather forecast                                | Rain                   | 0.019 (0.65)                 |
| "                                               | Storm                  | -0.037 (-1.02)               |
| Text Message Reminder Service                   | Activated but not sent | -0.088 (-1.73)               |
| "                                               | Sent                   | -0.276 (-4.99) ***           |
| <i>Factors associated with the examination</i>  |                        |                              |
| No NHS coverage period                          | Yes                    | 0.855 (8.18) ***             |
| Contrast agent                                  | Yes                    | 0.014 (0.51)                 |
| Price of the examination                        |                        | -0.001 (-5.91) ***           |
| Waiting list                                    |                        | 0.004 (2.42) *               |
| Time allowed                                    |                        | -0.001 (-1.43)               |
| <i>Goodness of fit measures</i>                 |                        | Computer-Assisted Tomography |
|                                                 | R <sup>2</sup>         | 0.07                         |
|                                                 | Hosmer-Lemeshow        | 15.42                        |
|                                                 | AIC                    | 26028.66                     |
|                                                 | AUC                    | 0.7                          |
| <i>Goodness of fit measures - Out of Sample</i> |                        | Computer-Assisted Tomography |
|                                                 | Hosmer-Lemeshow        | 15.79                        |
|                                                 | AUC                    | 0.67                         |

Estimated parameters, z-value (in parentheses) and significance symbols are reported.

Significance codes: 0 '\*\*\*' 0.001 '\*\*' 0.01 '\*' 0.05

### Description of the flow chart

#### Main procedure:

- The starting block (A) declares/reads the needed variables.
- Blocks from (B) to (G) are cycled a number of times equal to the number of days in `DaysList`. The generic day is denoted with `d`.
- Block (B) :
  - draws randomly the set of patients of the day (`DayPatients`)
  - builds the set of independent variables (`IndepVars`) of the patients selected by appending to their characteristics the variables related to the calendar of the examinations
  - computes the corresponding vector of no-show probabilities using `Coef` and `IndepVars`
- In case overbooking is active, the overbooking procedure is executed (C) and the corresponding overbooked patients (in terms of their no-show probability) are appended to the set of patients of the day (D).
- Block (E) computes the theoretical starting time for each examination (`ExaminationsBegin`) of day `d` to be passed to the next block.
- Block (F) calls the procedure that simulates the activity of the center in day `d`, delivering the information needed to compute the daily statistics (G).

#### Overbooking procedure:

- The starting block (A) reads the input variables from the main procedure.
- Block (B) computes the theoretical minutes eligible for overbooking (`OEM`) for each patient of the day, computes the number of patients (`NPatients`), and initializes to zero the minutes eligible for overbooking (`Sum`) and the number of extra-slots (`ExtraSlots`).
- Blocks (C) and (D) are cycled a number of times equal to `NPatients`.
- At the end, the number of `ExtraSlots` of the day is returned to the main procedure.

#### SimVar procedure:

- The starting block (A) reads the input variables from the main procedure.
- Block (B) computes the number of patients and initializes to zero some variables incremented in the cycle.
- Blocks (C) and (D) are cycled a number of times equal to the number of patients in the day to get the simulated number of show patients (`NShowPatients`), the finish time of the last patient (`FinishTime`) and the total waiting and idle times (`WaitingTime` and `IdleTime`, respectively).
- At the end (E), the following output is returned to the main procedure: the number of show patients (`NShowPatients`), the finish time of the last show patient (`FinishTime`), and the average idle and waiting time (`IdleTime` and `WaitingTime`).

Figure 1: Flowchart of the overbooking algorithm – Main Procedure.

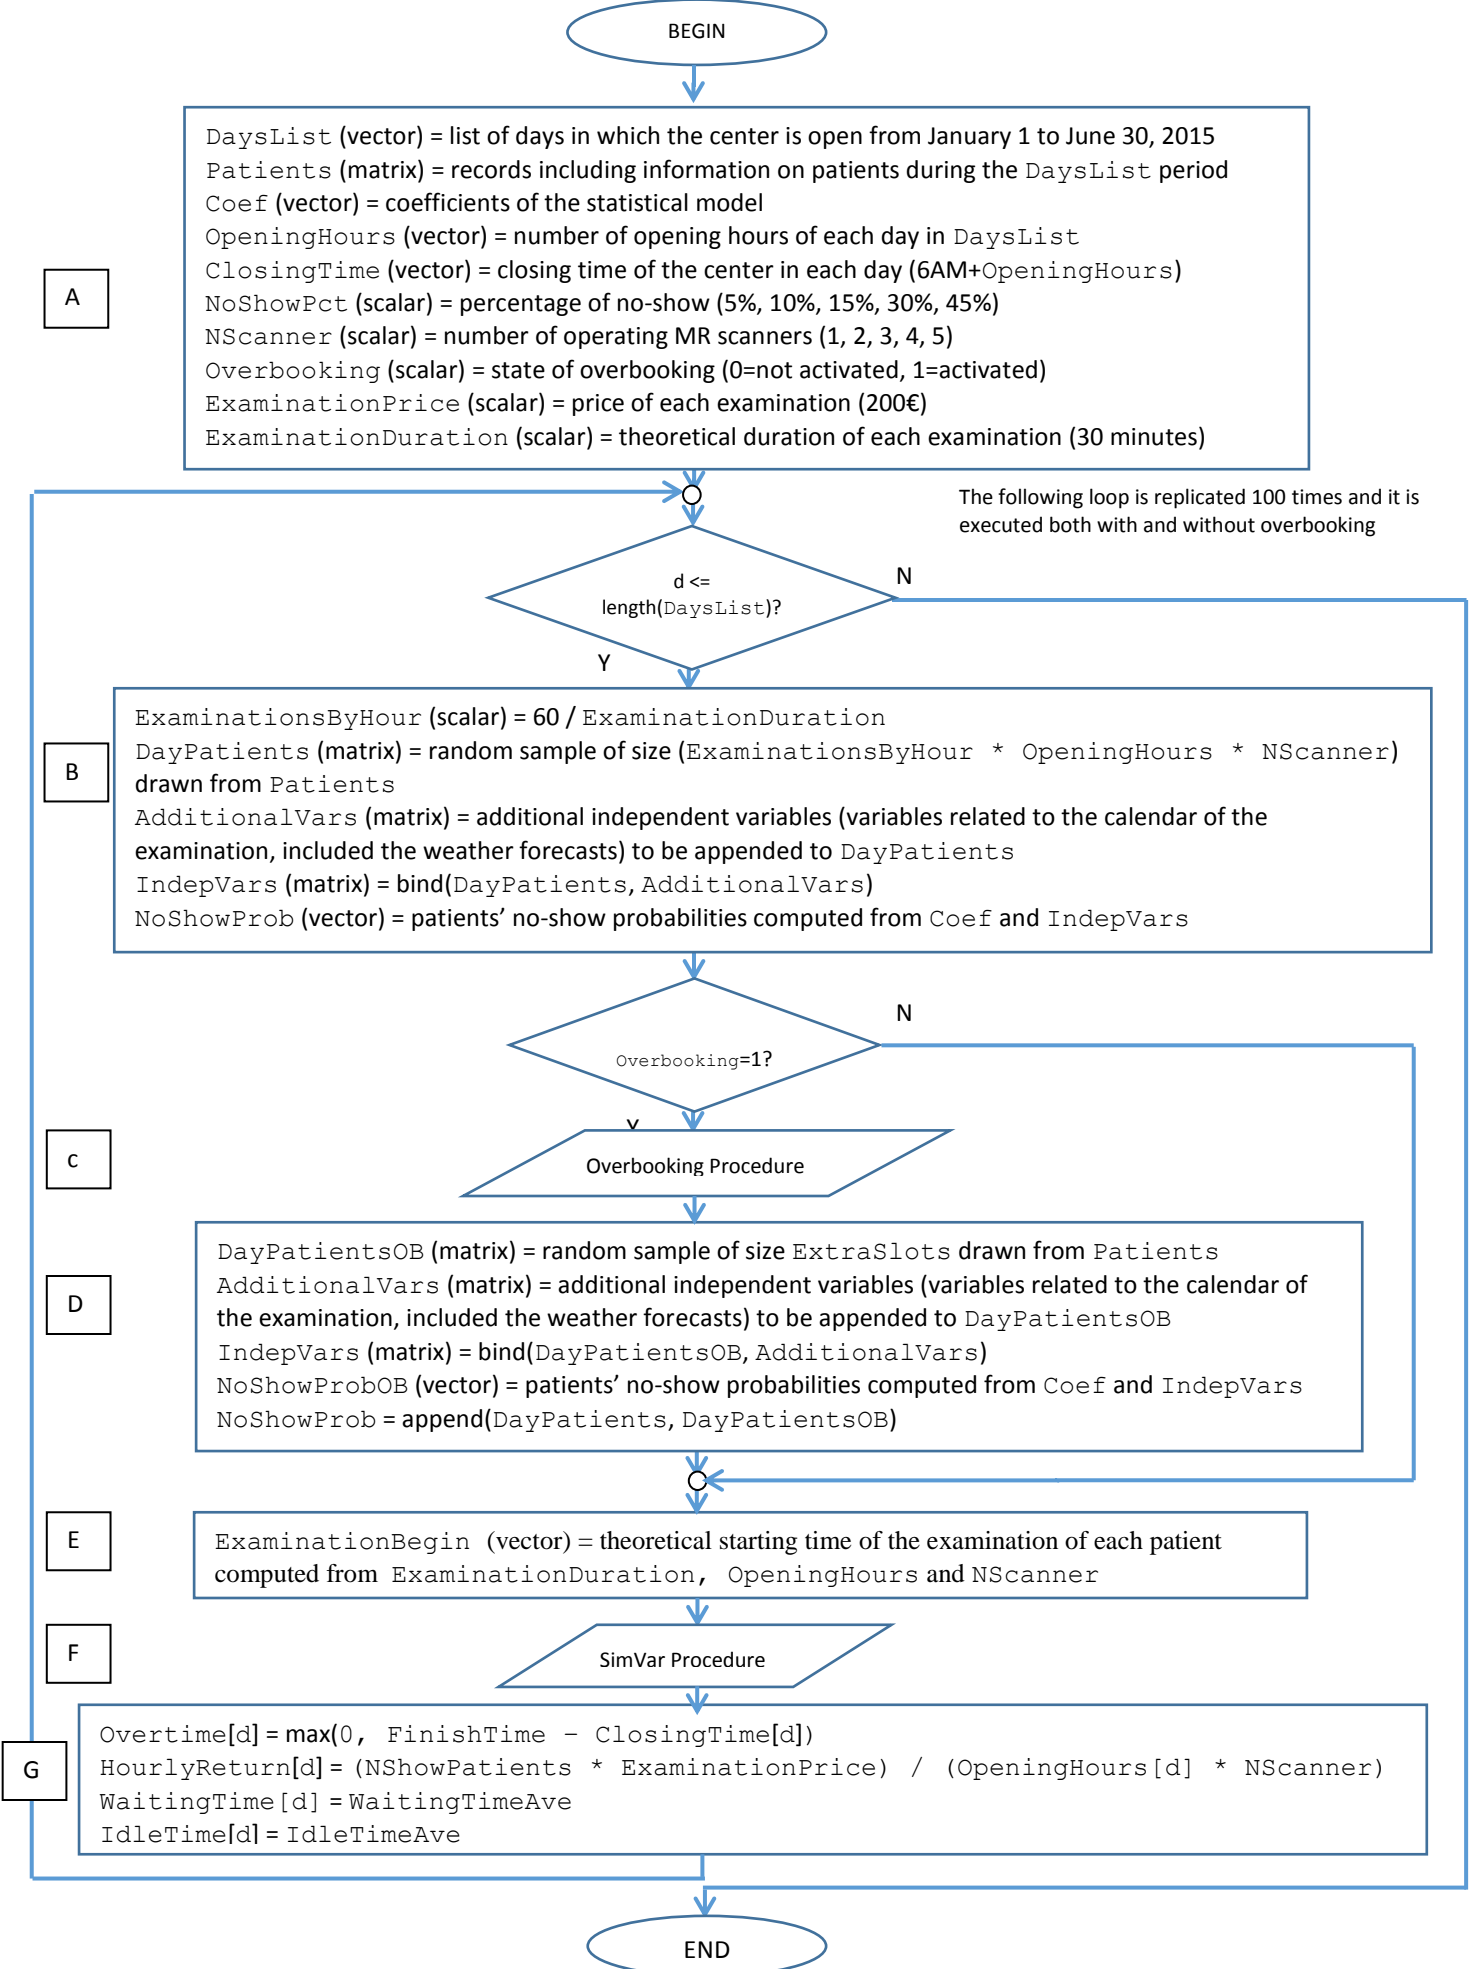



Figure 2: Flowchart of the overbooking algorithm – Overbooking Procedure.

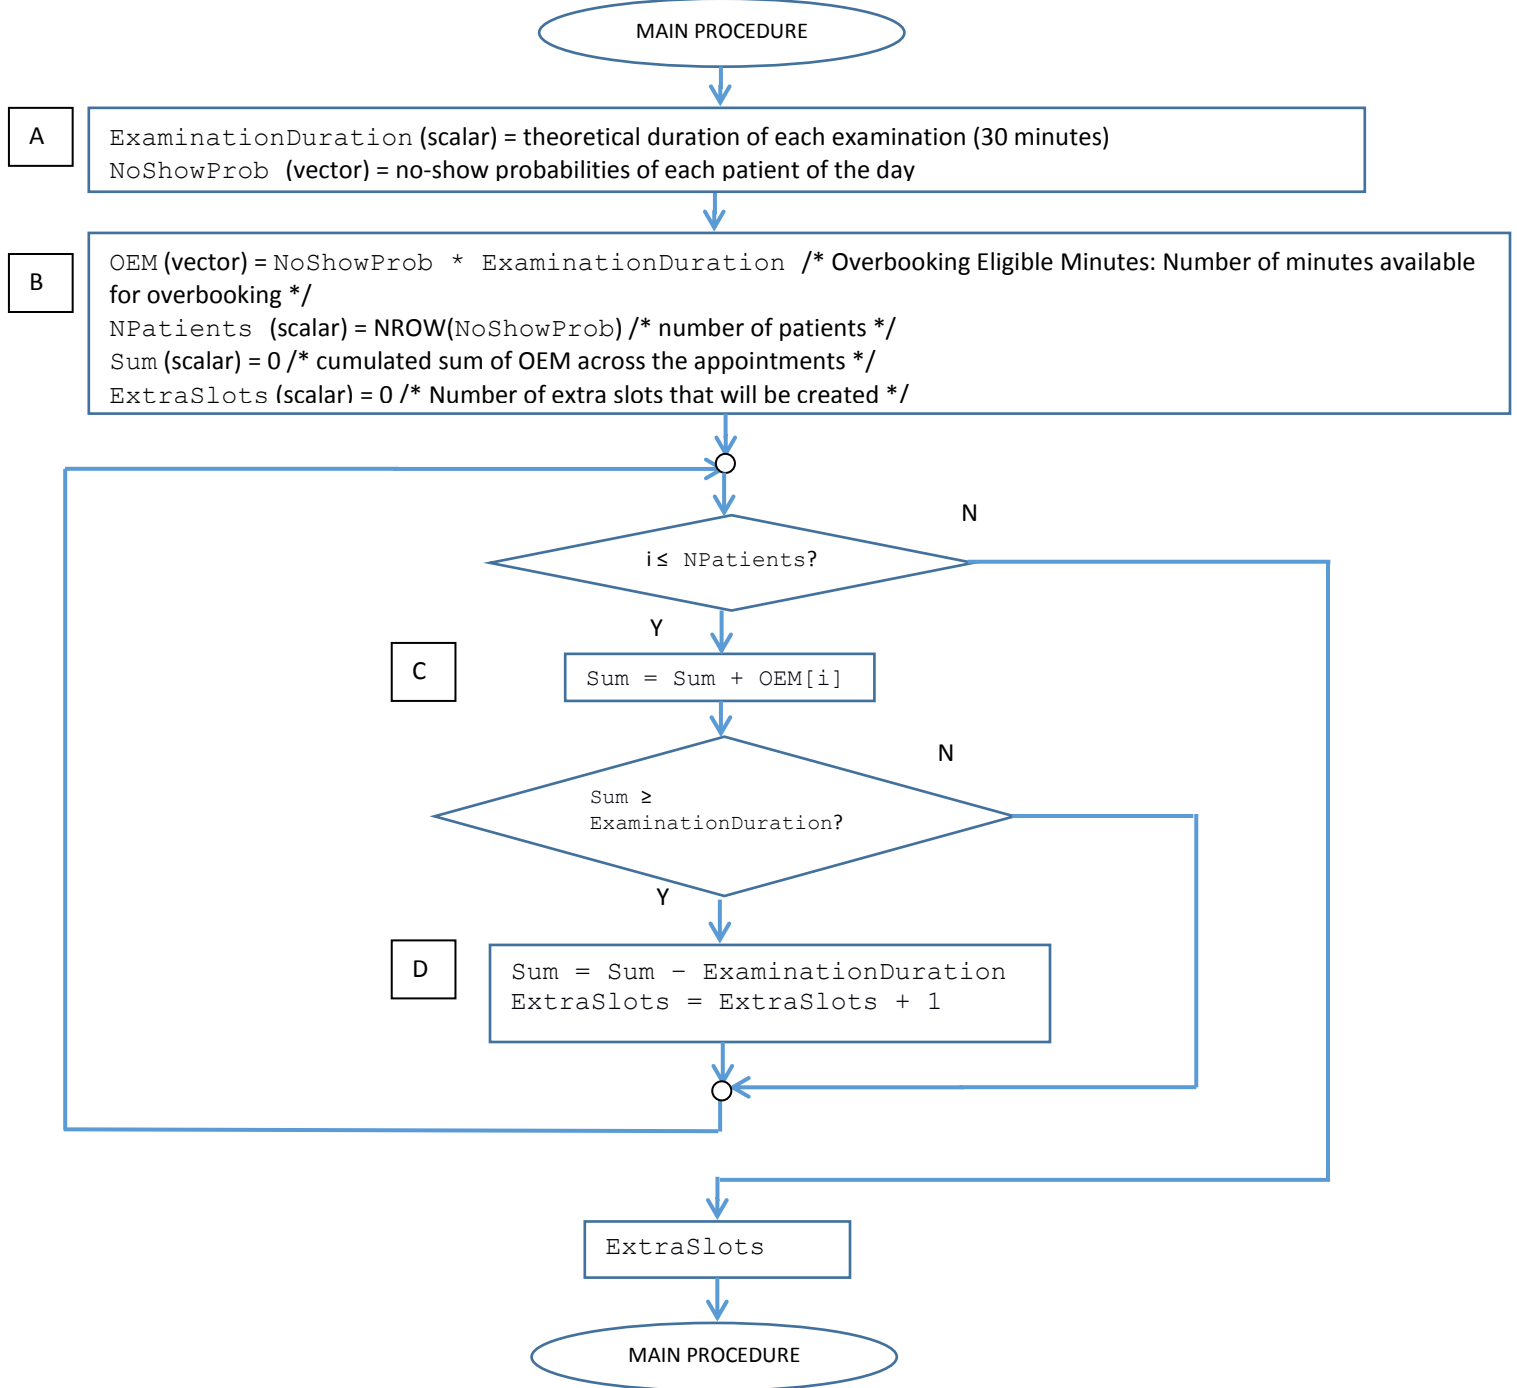

Figure 3: Flowchart of the overbooking algorithm – SimVar Procedure.

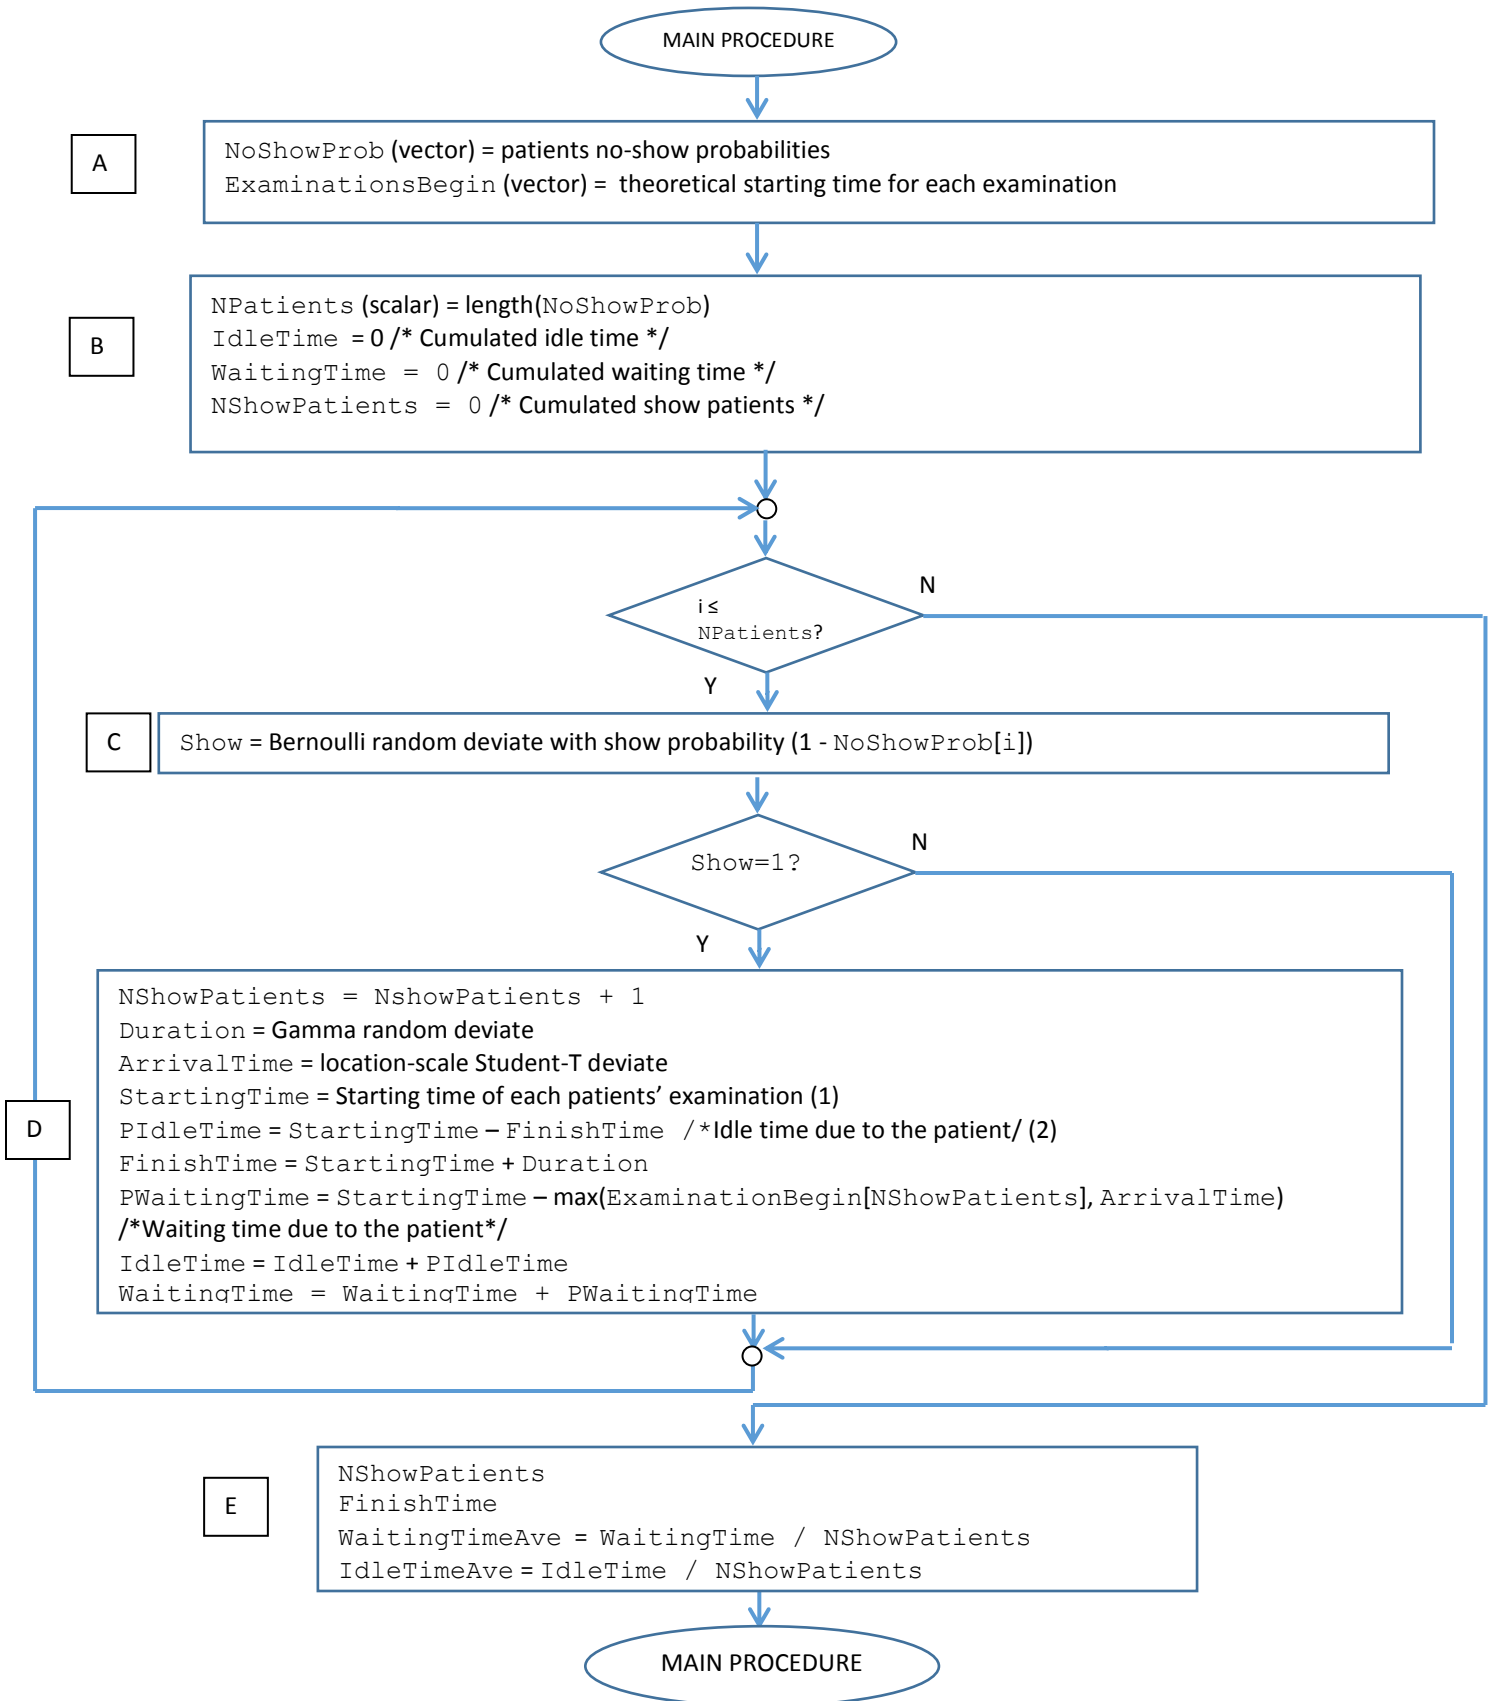

- (1) It is computed with a rule that takes into account the arrival time of the current patient as well as the advance/late arrival and the duration of the examination of the previous patients
- (2) It depends on the starting time of its examination as well as the finish time of the previous patient. For the first patient, this variable is 0, otherwise its value depends on the patient's delay
